# Supplementary material for: What factors are important to whom in what context, when adults are prescribed hearing aids for hearing loss? A realist review protocol
Source: HighWire-hosted journal article supplement (doi:10.1136/bmjopen-2021-059836), 2022-07-01
Supplement: bmjopen-2021-059836supp001_data_supplement.pdf [file bmjopen-2021-059836supp001_data_supplement.pdf]

## Supplementary File

Search #1

**CINAHL (1994 – present)**

| <b>SEARCHES</b> |                                                                                                                                                                                                                                                                                                                                                                      |
|-----------------|----------------------------------------------------------------------------------------------------------------------------------------------------------------------------------------------------------------------------------------------------------------------------------------------------------------------------------------------------------------------|
| <b>S1</b>       | (MH "Hearing Disorders+")                                                                                                                                                                                                                                                                                                                                            |
| <b>S2</b>       | (MH "Deafness+")                                                                                                                                                                                                                                                                                                                                                     |
| <b>S3</b>       | (MH "Rehabilitation of Hearing Impaired+") OR "persons with hearing impairments"                                                                                                                                                                                                                                                                                     |
| <b>S4</b>       | (MH "Presbycusis") OR "presbycusis"                                                                                                                                                                                                                                                                                                                                  |
| <b>S5</b>       | (MH "Rehabilitation of Hearing Impaired+") OR (MH "Hearing Disorders+") OR "(hearing loss* OR deaf* OR hearing impair* OR hearing disabilit* OR hearing disorder* OR hearing handicap* OR hearing problem* OR presbycus* OR presbyacus* OR auditory rehabilit*).af."                                                                                                 |
| <b>S6</b>       | (MH "Hearing Aids+")                                                                                                                                                                                                                                                                                                                                                 |
| <b>S7</b>       | (MH "Hearing Aids+") OR "(hearing aid* OR listening device* OR sound amplif* OR acoustic amplif* OR hearing device*).af."                                                                                                                                                                                                                                            |
| <b>S8</b>       | (MH "Patient Compliance+") OR "treatment adherence and compliance"                                                                                                                                                                                                                                                                                                   |
| <b>S9</b>       | (MH "Patient Compliance+")                                                                                                                                                                                                                                                                                                                                           |
| <b>S10</b>      | "(prescri* OR provi* OR complian* OR cooperat* OR co operat* OR non complian* OR noncomplian* OR non adheren* OR nonadheren* OR accept* OR nonaccept* OR satisfaction OR benefit* OR adapt* OR perception* OR use* OR usage OR adopt* OR uptake* OR reject* OR return* OR success* OR orientat* OR take-up OR utilis* OR non-use)" OR (MH "Prescriptions, Non-Drug") |
| <b>S11</b>      | S1 OR S2 OR S3 OR S4 OR S5                                                                                                                                                                                                                                                                                                                                           |
| <b>S12</b>      | S6 OR S7                                                                                                                                                                                                                                                                                                                                                             |
| <b>S13</b>      | S8 OR S9 OR S10                                                                                                                                                                                                                                                                                                                                                      |
| <b>S14</b>      | S11 AND S12                                                                                                                                                                                                                                                                                                                                                          |
| <b>S15</b>      | S13 AND S14                                                                                                                                                                                                                                                                                                                                                          |
| <b>S16</b>      | S15 AND ADULT                                                                                                                                                                                                                                                                                                                                                        |

**Cochrane Library (1996 - present)**

| <b>SEARCHES</b> |                                                                                                                                                                                                                                                                                                                        |
|-----------------|------------------------------------------------------------------------------------------------------------------------------------------------------------------------------------------------------------------------------------------------------------------------------------------------------------------------|
| <b>1</b>        | Hearing Loss                                                                                                                                                                                                                                                                                                           |
| <b>2</b>        | Deafness                                                                                                                                                                                                                                                                                                               |
| <b>3</b>        | Persons With Hearing Impairments                                                                                                                                                                                                                                                                                       |
| <b>4</b>        | Presbycusis                                                                                                                                                                                                                                                                                                            |
| <b>5</b>        | hearing loss* or deaf* or hearing impair* or hearing disabilit* or hearing disorder* or hearing handicap* or hearing problem* or presbycus* or presbyacus* or auditory rehabilit*                                                                                                                                      |
| <b>6</b>        | Hearing Aids                                                                                                                                                                                                                                                                                                           |
| <b>7</b>        | hearing aid* or listening device* or sound amplif* or acoustic amplif* or hearing device*                                                                                                                                                                                                                              |
| <b>8</b>        | treatment adherence and compliance                                                                                                                                                                                                                                                                                     |
| <b>9</b>        | Patient Compliance                                                                                                                                                                                                                                                                                                     |
| <b>10</b>       | prescri* or provi* or complian* or cooperat* or co operat* or non complian* or noncomplian* or non adheren* or nonadheren* or accept* or nonaccept* or satisfaction or benefit* or adapt* or perception* or usage or adopt* or uptake* or reject* or return* or success* or orientat* or take-up or utilis* or non-use |
| <b>11</b>       | #1 OR #2 OR #3 OR #4 OR #5                                                                                                                                                                                                                                                                                             |
| <b>12</b>       | #6 OR #7                                                                                                                                                                                                                                                                                                               |
| <b>13</b>       | #8 OR #9 OR #10                                                                                                                                                                                                                                                                                                        |
| <b>14</b>       | #11 AND #12                                                                                                                                                                                                                                                                                                            |
| <b>15</b>       | #13 AND #14                                                                                                                                                                                                                                                                                                            |
| <b>16</b>       | #15 "Adult"                                                                                                                                                                                                                                                                                                            |

**EMBASE (1974 – present)****SEARCHES**

|           |                                                                                                                                                                                                                                                                                                                                      |
|-----------|--------------------------------------------------------------------------------------------------------------------------------------------------------------------------------------------------------------------------------------------------------------------------------------------------------------------------------------|
| <b>1</b>  | hearing loss.mp. or exp hearing impairment/                                                                                                                                                                                                                                                                                          |
| <b>2</b>  | deafness.mp. or exp hearing impairment/                                                                                                                                                                                                                                                                                              |
| <b>3</b>  | exp hearing impaired person/                                                                                                                                                                                                                                                                                                         |
| <b>4</b>  | Presbycusis.mp. or exp presbyacusic/                                                                                                                                                                                                                                                                                                 |
| <b>5</b>  | (hearing loss* or deaf* or hearing impair* or hearing disabilit* or hearing disorder* or hearing handicap* or hearing problem* or presbycus* or presbyacus* or auditory rehabilit*).af.                                                                                                                                              |
| <b>6</b>  | hearing aids.mp. or exp hearing aid/                                                                                                                                                                                                                                                                                                 |
| <b>7</b>  | (hearing aid* or listening device* or sound amplif* or acoustic amplif* or hearing device*).af.                                                                                                                                                                                                                                      |
| <b>8</b>  | (treatment adherence and compliance).mp. [mp=title, abstract, heading word, drug trade name, original title, device manufacturer, drug manufacturer, device trade name, keyword heading word, floating subheading word, candidate term word]                                                                                         |
| <b>9</b>  | exp patient compliance/                                                                                                                                                                                                                                                                                                              |
| <b>10</b> | (prescri* or provi* or complian* or cooperat* or co operat* or non complian* or noncomplian* or non adheren* or nonadheren* or accept* or nonaccept* or satisfaction or benefit* or adapt* or perception* or use* or usage or adopt* or uptake* or reject* or return* or success* or orientat* or take-up or utilis* or non-use).af. |
| <b>11</b> | 1 or 2 or 3 or 4 or 5                                                                                                                                                                                                                                                                                                                |
| <b>12</b> | 6 or 7                                                                                                                                                                                                                                                                                                                               |
| <b>13</b> | 8 or 9 or 10                                                                                                                                                                                                                                                                                                                         |
| <b>14</b> | 11 and 12                                                                                                                                                                                                                                                                                                                            |
| <b>15</b> | 13 and 14                                                                                                                                                                                                                                                                                                                            |
| <b>16</b> | 15 and "Adult" [Subjects]                                                                                                                                                                                                                                                                                                            |

**MEDLINE (1950 – present)**

| <b>SEARCHES</b> |                                                                                                                                                                                                                                                                                                                                |
|-----------------|--------------------------------------------------------------------------------------------------------------------------------------------------------------------------------------------------------------------------------------------------------------------------------------------------------------------------------|
| <b>S1</b>       | hearing loss                                                                                                                                                                                                                                                                                                                   |
| <b>S2</b>       | deafness                                                                                                                                                                                                                                                                                                                       |
| <b>S3</b>       | persons with hearing impairments                                                                                                                                                                                                                                                                                               |
| <b>S4</b>       | Presbycusis                                                                                                                                                                                                                                                                                                                    |
| <b>S5</b>       | hearing loss* OR deaf* OR hearing impair* OR hearing disabilit* OR hearing disorder* OR hearing handicap* OR hearing problem* OR presbycus* OR presbyacus* OR auditory rehabilit*                                                                                                                                              |
| <b>S6</b>       | hearing aids                                                                                                                                                                                                                                                                                                                   |
| <b>S7</b>       | hearing aid* OR listening device* OR sound amplif* OR acoustic amplif* OR hearing device*                                                                                                                                                                                                                                      |
| <b>S8</b>       | treatment adherence and compliance                                                                                                                                                                                                                                                                                             |
| <b>S9</b>       | Patient Compliance                                                                                                                                                                                                                                                                                                             |
| <b>S10</b>      | prescri* OR provi* OR complian* OR cooperat* OR co operat* OR non complian* OR noncomplian* OR non adheren* OR nonadheren* OR accept* OR nonaccept* OR satisfaction OR benefit* OR adapt* OR perception* OR use* OR usage OR adopt* OR uptake* OR reject* OR return* OR success* OR orientat* OR take-up OR utilis* OR non-use |
| <b>S11</b>      | S1 OR S2 OR S3 OR S4 OR S5                                                                                                                                                                                                                                                                                                     |
| <b>S12</b>      | S6 OR S7                                                                                                                                                                                                                                                                                                                       |
| <b>S13</b>      | S8 OR S9 OR S10                                                                                                                                                                                                                                                                                                                |
| <b>S14</b>      | S11 AND S12                                                                                                                                                                                                                                                                                                                    |
| <b>S15</b>      | S13 AND S14                                                                                                                                                                                                                                                                                                                    |
| <b>S16</b>      | S15 "adult".sa suba.                                                                                                                                                                                                                                                                                                           |

## PsycINFO (1967 – present)

| <b>SEARCHES</b> |                                                                                                                                                                                                                                                                                                                                      |
|-----------------|--------------------------------------------------------------------------------------------------------------------------------------------------------------------------------------------------------------------------------------------------------------------------------------------------------------------------------------|
| <b>1</b>        | exp Hearing Disorders/ or hearing loss.mp.                                                                                                                                                                                                                                                                                           |
| <b>2</b>        | exp Deaf/ or deafness.mp.                                                                                                                                                                                                                                                                                                            |
| <b>3</b>        | Persons With Hearing Impairments.mp.                                                                                                                                                                                                                                                                                                 |
| <b>4</b>        | exp Hearing Disorders/ or Presbycusis.mp.                                                                                                                                                                                                                                                                                            |
| <b>5</b>        | (hearing loss* or deaf* or hearing impair* or hearing disabilit* or hearing disorder* or hearing handicap* or hearing problem* or presbycus* or presbyacus* or auditory rehabilit*).af.                                                                                                                                              |
| <b>6</b>        | exp Hearing Aids/                                                                                                                                                                                                                                                                                                                    |
| <b>7</b>        | (hearing aid* or listening device* or sound amplif* or acoustic amplif* or hearing device*).af.                                                                                                                                                                                                                                      |
| <b>8</b>        | (treatment adherence and compliance).mp. [mp=title, abstract, heading word, table of contents, key concepts, original title, tests & measures, mesh word]                                                                                                                                                                            |
| <b>9</b>        | exp Treatment Compliance/ or Patient Compliance.mp.                                                                                                                                                                                                                                                                                  |
| <b>10</b>       | (prescri* or provi* or complian* or cooperat* or co operat* or non complian* or noncomplian* or non adheren* or nonadheren* or accept* or nonaccept* or satisfaction or benefit* or adapt* or perception* or use* or usage or adopt* or uptake* or reject* or return* or success* or orientat* or take-up or utilis* or non-use).af. |
| <b>11</b>       | 1 or 2 or 3 or 4 or 5                                                                                                                                                                                                                                                                                                                |
| <b>12</b>       | 6 or 7                                                                                                                                                                                                                                                                                                                               |
| <b>13</b>       | 8 or 9 or 10                                                                                                                                                                                                                                                                                                                         |
| <b>14</b>       | 11 and 12                                                                                                                                                                                                                                                                                                                            |
| <b>15</b>       | 13 and 14                                                                                                                                                                                                                                                                                                                            |
| <b>16</b>       | limit 15 to "300 adulthood <age 18 yrs and older>"                                                                                                                                                                                                                                                                                   |

## PubMed (1996 – present)

| SEARCHES |                                                                                                                                                                                                                                                                                                                                      |
|----------|--------------------------------------------------------------------------------------------------------------------------------------------------------------------------------------------------------------------------------------------------------------------------------------------------------------------------------------|
| 1        | Hearing Loss                                                                                                                                                                                                                                                                                                                         |
| 2        | Deafness                                                                                                                                                                                                                                                                                                                             |
| 3        | Persons With Hearing Impairments                                                                                                                                                                                                                                                                                                     |
| 4        | Presbycusis                                                                                                                                                                                                                                                                                                                          |
| 5        | (hearing loss* OR deaf* OR hearing impair* OR hearing disabilit* OR hearing disorder* OR hearing handicap* OR hearing problem* OR presbycus* OR presbyacus* OR auditory rehabilit*).af.                                                                                                                                              |
| 6        | hearing aids                                                                                                                                                                                                                                                                                                                         |
| 7        | (hearing aid* OR listening device* OR sound amplif* OR acoustic amplif* OR hearing device*).af.                                                                                                                                                                                                                                      |
| 8        | treatment adherence and compliance                                                                                                                                                                                                                                                                                                   |
| 9        | Patient Compliance                                                                                                                                                                                                                                                                                                                   |
| 10       | (prescri* OR provi* OR complian* OR cooperat* OR co operat* OR non complian* OR noncomplian* OR non adheren* OR nonadheren* OR accept* OR nonaccept* OR satisfaction OR benefit* OR adapt* OR perception* OR use* OR usage OR adopt* OR uptake* OR reject* OR return* OR success* OR orientat* OR take-up OR utilis* OR non-use).af. |
| 11       | #1 OR #2 OR #3 OR #4 OR #5                                                                                                                                                                                                                                                                                                           |
| 12       | #6 OR #7                                                                                                                                                                                                                                                                                                                             |
| 13       | #8 OR #9 OR #10                                                                                                                                                                                                                                                                                                                      |
| 14       | #11 AND #12                                                                                                                                                                                                                                                                                                                          |
| 15       | #13 AND #14                                                                                                                                                                                                                                                                                                                          |
| 16       | #15 AND adult                                                                                                                                                                                                                                                                                                                        |

**Web of Science (1998 – present)**

| <b>SEARCHES</b> |                                                                                                                                                                                                                                                                                                                                            |
|-----------------|--------------------------------------------------------------------------------------------------------------------------------------------------------------------------------------------------------------------------------------------------------------------------------------------------------------------------------------------|
| <b>1</b>        | ALL=(hearing loss)                                                                                                                                                                                                                                                                                                                         |
| <b>2</b>        | ALL=(deafness)                                                                                                                                                                                                                                                                                                                             |
| <b>3</b>        | ALL=(Persons With Hearing Impairments)                                                                                                                                                                                                                                                                                                     |
| <b>4</b>        | ALL=(Presbycusis)                                                                                                                                                                                                                                                                                                                          |
| <b>5</b>        | ALL=((hearing loss* OR deaf* OR hearing impair* OR hearing disabilit* OR hearing disorder* OR hearing handicap* OR hearing problem* OR presbycus* OR presbyacus* OR auditory rehabilit*).af.)                                                                                                                                              |
| <b>6</b>        | ALL=(hearing aids)                                                                                                                                                                                                                                                                                                                         |
| <b>7</b>        | ALL=((hearing aid* OR listening device* OR sound amplif* OR acoustic amplif* OR hearing device*).af.)                                                                                                                                                                                                                                      |
| <b>8</b>        | ALL=((treatment adherence and compliance))                                                                                                                                                                                                                                                                                                 |
| <b>9</b>        | ALL=(Patient Compliance)                                                                                                                                                                                                                                                                                                                   |
| <b>10</b>       | ALL=((prescri* OR provi* OR complian* OR cooperat* OR co operat* OR non complian* OR noncomplian* OR non adheren* OR nonadheren* OR accept* OR nonaccept* OR satisfaction OR benefit* OR adapt* OR perception* OR use* OR usage OR adopt* OR uptake* OR reject* OR return* OR success* OR orientat* OR take-up OR utilis* OR non-use).af.) |
| <b>11</b>       | #1 OR #2 OR #3 OR #4 OR #5                                                                                                                                                                                                                                                                                                                 |
| <b>12</b>       | #6 OR #7                                                                                                                                                                                                                                                                                                                                   |
| <b>13</b>       | #8 OR #9 OR #10                                                                                                                                                                                                                                                                                                                            |
| <b>14</b>       | #11 AND #12                                                                                                                                                                                                                                                                                                                                |
| <b>15</b>       | #13 AND #14                                                                                                                                                                                                                                                                                                                                |
| <b>16</b>       | #15 and Adults                                                                                                                                                                                                                                                                                                                             |
